# Supplementary material
Source: Springer Nature journal article supplement (https://www.springermedizin.de/resource/supplementary/12865_2012_484_MOESM7_ESM.pdf/9428086)

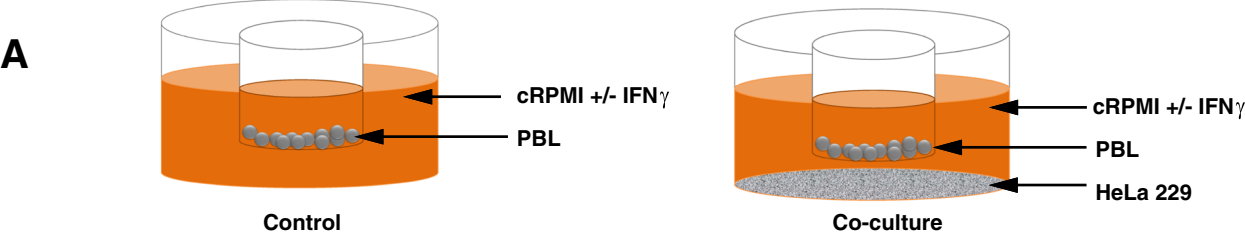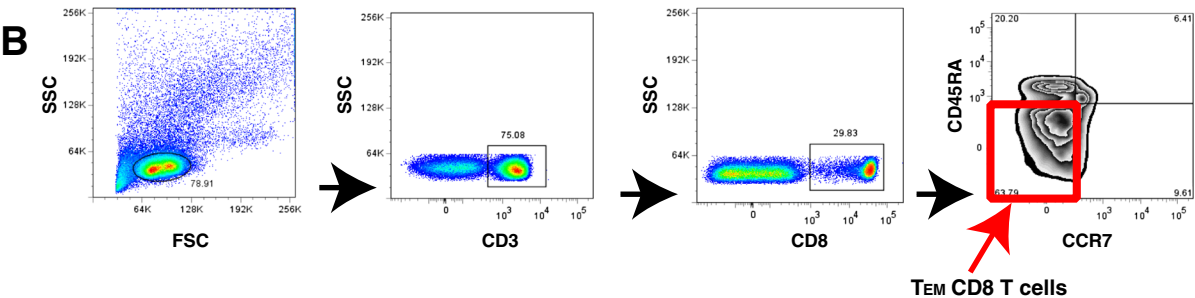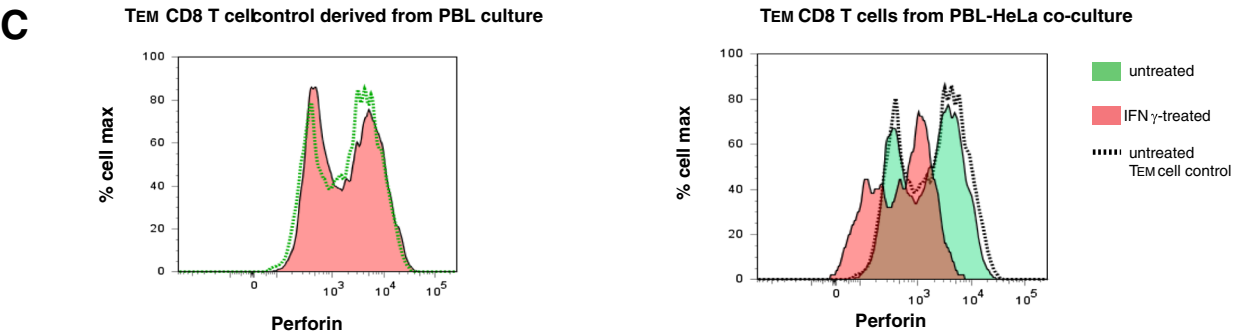

Supplement: MOESM7 [file 9428086]
